# Supplementary material for: Bioacoustic Monitoring Reveals the Calling Activity of an Endangered Mountaintop Frog (Philoria kundagungan) in Response to Environmental Conditions
Source: MDPI journal article supplement (doi:10.3390/d15080931), 2023-08-15
Supplement: s1 [file s1]

## Supplementary Material

### Model Output from top model explaining calling activity of the Mountain Frog (*Philoria kundagungan*)

Family: Tweedie(1.5)

Link function: log

Formula:

calls ~ s(minimum\_temperature) + s(site, Season, bs = "re")

Parametric coefficients:

|             | Estimate | Std. Error | t value | Pr(> t )   |
|-------------|----------|------------|---------|------------|
| (Intercept) | 6.2611   | 0.4903     | 12.77   | <2e-16 *** |

---

Signif. codes: 0 '\*\*\*' 0.001 '\*\*' 0.01 '\*' 0.05 '.' 0.1 ' ' 1

Approximate significance of smooth terms:

|                        | edf   | Ref.df | F     | p-value    |
|------------------------|-------|--------|-------|------------|
| s(minimum_temperature) | 4.506 | 4.895  | 26.55 | <2e-16 *** |
| s(Season,site)         | 9.871 | 10.000 | 58.72 | <2e-16 *** |

---

Signif. codes: 0 '\*\*\*' 0.001 '\*\*' 0.01 '\*' 0.05 '.' 0.1 ' ' 1

R-sq.(adj) = 0.363 Deviance explained = 42.3%

fREML = 5972.2 Scale est. = 104.13 n = 1752
